# Supplementary material for: Chemical Profiling, Bioactive Properties, and Anticancer and Antimicrobial Potential of Juglans regia L. Leaves
Source: MDPI journal article supplement (doi:10.3390/molecules28041989), 2023-02-20
Supplement: s1 [file s1]

Supplementary material

# Chemical Profiling, Bioactive Properties, and Anticancer and Antimicrobial Potential of *Juglans regia* L. Leaves

Natalia Żurek <sup>1</sup>, Karolina Pycia <sup>1</sup>, Agata Pawłowska <sup>1</sup>, Leszek Potocki <sup>2</sup> and Ireneusz Tomasz Kapusta <sup>1,\*</sup>

<sup>1</sup> Department of Food Technology and Human Nutrition, College of Natural Sciences, University of Rzeszow, 4 Zelwerowicza St., 35-601 Rzeszow, Poland; nzurek@ur.edu.pl (N.Ż.); kpycia@ur.edu.pl (K.P.); agpawlowska@ur.edu.pl (A.P.)

<sup>2</sup> Department of Biotechnology, College of Natural Sciences, University of Rzeszow, 1 Pigonia St., 35-310 Rzeszow, Poland; lpotocki@ur.edu.pl

\* Correspondence: ikapusta@ur.edu.pl; Tel.: +48-17-785-5238

## Content:

**Supplementary Table S1:** Correlation between TPC, TFC, TPA in *J. regia* leaves preparation and antioxidant activity.

**Supplementary Table S2:** Correlation between TPC, TFC, TPA in *J. regia* leaves preparation and antiproliferation activity

**Table S1.** Correlation between TPC, TFC, TPA in *J. regia* leaves preparation and antioxidant activity determined by O<sub>2</sub><sup>•</sup>, OH<sup>•</sup>, ChA, ABTS, and CUPRAC methods.

|                             | TPC     | TFC    | TPA    |
|-----------------------------|---------|--------|--------|
| O <sub>2</sub> <sup>•</sup> | -0.992  | -0.890 | -0.941 |
| OH <sup>•</sup>             | -0.842  | -0.733 | -0.428 |
| ChA                         | -0.354  | -0.182 | -0.196 |
| ABTS                        | 0.978   | 0.996  | 0.993  |
| CUPRAC                      | 0.999** | 0.998* | 0.417  |

(+) positive correlation, (-) negative correlation, \*significant differences at  $p < 0.05$ , \*\* significant differences at  $p < 0.01$ .

**Table S2.** Correlation between TPC, TFC, TPA in *J. regia* leaves preparation and antiproliferation activity against CCD841 CoN, DLD-1, Caco-2, MCF-7, U87MG, U251MG, and SK-Mel-29 cell lines.

|            | TPC     | TFC     | TPA    |
|------------|---------|---------|--------|
| CCD841 CoN | -0.182  | -0.354  | -0.676 |
| DLD-1      | -0.161  | -0.998* | -0.388 |
| Caco-2     | -0.333  | -0.160  | -0.218 |
| MCF-7      | -0.999* | -0.996  | -0.871 |
| U87MG      | -0.660  | -0.515  | -0.159 |
| U251MG     | -0.958  | -0.994* | -0.964 |
| SK-Mel-29  | -0.580  | -0.715  | -0.923 |

(+) positive correlation, (-) negative correlation, \*significant differences at  $p < 0.05$ , \*\* significant differences at  $p < 0.01$ .
